# Supplementary material for: Thermodynamic limits of the depolymerization of poly(olefin)s using mechanochemistry
Source: RSC Mechanochem. 2024 Aug 26;1(5):504–13. doi: 10.1039/d4mr00079j (PMC11388944; doi:10.1039/d4mr00079j)
Supplement: MR-001-D4MR00079J-s001 [file MR-001-D4MR00079J-s001.xlsx]

## Sheet: PS
Temperature	Styrene heat capacity	Poly(styrene)	Enthalpy of propagation	Entropy of propagation	Gibbs energy of propagation	Depolymerization equilibrium constant		Temperature	Density		fugacity coefficient	P = 1 atm														T_G = 298
(K)	(J/molK)	(J/molK)	(J/mol)	(J/molK)	(J/mol)	(a.u.)		(K)	(g/cm3)			T_G (K)														P (atm)
298	120.526	126.425	-41003.2	-80.3328	-17064	0.00102057		298	1.04554		mol fraction styrene	273	283	293	303	313	323	333	343	353	363	373	383	393	403	1	2	3	4	5
300	121.458	127.378	-40991.4	-80.2933	-16903.4	0.00113959		298.5	1.04541		0.005	0.97654	0.978542	0.980395	0.982207	0.983823	0.985269	0.986567	0.987735	0.988789	0.989742	0.990606	0.991391	0.992105	0.992756	0.981327	0.963095	0.945737	0.928714	0.912022
302	122.383	128.333	-40979.5	-80.2538	-16742.9	0.00127061		299	1.04528		0.01	0.97654	0.978542	0.980149	0.981607	0.983267	0.984754	0.986088	0.987289	0.988373	0.989353	0.990242	0.991049	0.991785	0.992455	0.980798	0.963095	0.945737	0.928714	0.912022
304	123.303	129.29	-40967.6	-80.2144	-16582.4	0.00141461		299.5	1.04515		0.015	0.97654	0.978542	0.980149	0.981339	0.982715	0.984241	0.985611	0.986845	0.987959	0.988966	0.98988	0.99071	0.991466	0.992156	0.980798	0.963095	0.945737	0.928714	0.912022
306	124.217	130.25	-40955.6	-80.175	-16422	0.00157268		300	1.04502		0.02	0.97654	0.978542	0.980149	0.981339	0.982165	0.983731	0.985137	0.986404	0.987547	0.988581	0.98952	0.990372	0.991149	0.991858	0.980798	0.963095	0.945737	0.928715	0.912022
308	125.124	131.212	-40943.4	-80.1355	-16261.7	0.00174595		300.5	1.04489		0.025	0.97654	0.978542	0.980149	0.981339	0.982074	0.983224	0.984666	0.985965	0.987137	0.988199	0.989161	0.990037	0.990834	0.991561	0.980798	0.963095	0.945737	0.928715	0.912022
310	126.026	132.176	-40931.2	-80.0959	-16101.5	0.00193565		301	1.04476		0.03	0.97654	0.978542	0.980149	0.981339	0.982074	0.98272	0.984197	0.985528	0.98673	0.987818	0.988805	0.989703	0.99052	0.991267	0.980798	0.963095	0.945737	0.928715	0.912022
312	126.922	133.141	-40918.8	-80.0562	-15941.3	0.00214305		301.5	1.04463		0.035	0.97654	0.978542	0.980149	0.981339	0.982074	0.982302	0.983731	0.985093	0.986324	0.987439	0.98845	0.98937	0.990208	0.990974	0.980798	0.963095	0.945737	0.928715	0.912022
314	127.812	134.109	-40906.3	-80.0162	-15781.2	0.00236952		302	1.0445		0.04	0.97654	0.978542	0.980149	0.981339	0.982074	0.982302	0.983267	0.984661	0.985921	0.987062	0.988098	0.98904	0.989898	0.990682	0.980798	0.963095	0.945737	0.928715	0.912022
316	128.697	135.079	-40893.6	-79.9759	-15621.2	0.00261652		302.5	1.04437		0.045	0.97654	0.978542	0.980149	0.981339	0.982074	0.982302	0.982805	0.984232	0.98552	0.986688	0.987747	0.988711	0.98959	0.990392	0.980798	0.963095	0.945737	0.928715	0.912022
318	129.576	136.05	-40880.8	-79.9354	-15461.3	0.00288558		303	1.04424		0.05	0.97654	0.978542	0.980149	0.981339	0.982074	0.982302	0.982347	0.983804	0.985122	0.986315	0.987398	0.988384	0.989283	0.990104	0.980798	0.963095	0.945737	0.928715	0.912022
320	130.449	137.024	-40867.7	-79.8945	-15301.5	0.00317832		303.5	1.04411		0.055	0.97654	0.978542	0.980149	0.981339	0.982074	0.982302	0.981969	0.983379	0.984725	0.985944	0.987052	0.988059	0.988978	0.989817	0.980798	0.963095	0.945737	0.928715	0.912022
322	131.317	137.999	-40854.5	-79.8532	-15141.7	0.00349644		304	1.04398		0.06	0.97654	0.978542	0.980149	0.981339	0.982074	0.982302	0.981969	0.982957	0.984331	0.985576	0.986707	0.987736	0.988674	0.989532	0.980798	0.963095	0.945737	0.928715	0.912022
324	132.18	138.976	-40841	-79.8115	-14982.1	0.00384177		304.5	1.04385		0.065	0.97654	0.978542	0.980149	0.981339	0.982074	0.982302	0.981969	0.982536	0.983939	0.985209	0.986364	0.987414	0.988372	0.989248	0.980798	0.963095	0.945737	0.928715	0.912022
326	133.038	139.954	-40827.3	-79.7693	-14822.5	0.00421619		305	1.04372		0.07	0.97654	0.978542	0.980149	0.981339	0.982074	0.982302	0.981969	0.982118	0.983549	0.984845	0.986022	0.987094	0.988072	0.988966	0.980798	0.963095	0.945737	0.928715	0.912022
328	133.89	140.935	-40813.3	-79.7266	-14663	0.00462172		305.5	1.04359		0.075	0.97654	0.978542	0.980149	0.981339	0.982074	0.982302	0.981969	0.981703	0.983161	0.984482	0.985683	0.986776	0.987774	0.988685	0.980798	0.963095	0.945737	0.928715	0.912022
330	134.737	141.916	-40799.1	-79.6833	-14503.6	0.00506045		306	1.04346		0.08	0.97654	0.978542	0.980149	0.981339	0.982074	0.982302	0.981969	0.98129	0.982775	0.984122	0.985346	0.98646	0.987477	0.988406	0.980798	0.963095	0.945737	0.928715	0.912022
332	135.579	142.9	-40784.6	-79.6395	-14344.3	0.00553461		306.5	1.04333		0.085	0.97654	0.978542	0.980149	0.981339	0.982074	0.982302	0.981969	0.981026	0.982392	0.983764	0.98501	0.986146	0.987182	0.988129	0.980798	0.963095	0.945737	0.928715	0.912022
334	136.415	143.885	-40769.8	-79.5951	-14185	0.00604652		307	1.0432		0.09	0.97654	0.978542	0.980149	0.981339	0.982074	0.982302	0.981969	0.981026	0.98201	0.983407	0.984677	0.985833	0.986888	0.987853	0.980798	0.963095	0.945737	0.928715	0.912022
336	137.247	144.871	-40754.7	-79.55	-14025.9	0.00659861		307.5	1.04307		0.095	0.97654	0.978542	0.980149	0.981339	0.982074	0.982302	0.981969	0.981026	0.981631	0.983053	0.984345	0.985522	0.986596	0.987578	0.980798	0.963095	0.945737	0.928715	0.912022
338	138.074	145.859	-40739.3	-79.5043	-13866.8	0.00719344		308	1.04294		0.1	0.97654	0.978542	0.980149	0.981339	0.982074	0.982302	0.981969	0.981026	0.981254	0.9827	0.984015	0.985213	0.986306	0.987306	0.980798	0.963095	0.945737	0.928715	0.912022
340	138.896	146.848	-40723.6	-79.4579	-13707.9	0.00783367		308.5	1.04281		0.2	0.97654	0.978542	0.980149	0.981339	0.982074	0.982302	0.981969	0.981026	0.97945	0.977261	0.977807	0.979393	0.980843	0.982171	0.980798	0.963095	0.945737	0.928715	0.912023
342	139.713	147.839	-40707.5	-79.4107	-13549	0.0085221		309	1.04268		0.3	0.97654	0.978542	0.980149	0.981339	0.982074	0.982302	0.981969	0.981026	0.97945	0.977261	0.974557	0.974257	0.976022	0.97764	0.980799	0.963096	0.945738	0.928716	0.912024
344	140.526	148.831	-40691.1	-79.3628	-13390.2	0.00926164		309.5	1.04255		0.4	0.97654	0.978542	0.980149	0.981339	0.982074	0.982302	0.981969	0.981027	0.97945	0.977261	0.974557	0.971549	0.971833	0.973703	0.980799	0.963096	0.945738	0.928717	0.912026
346	141.333	149.825	-40674.3	-79.3142	-13231.6	0.0100553		310	1.04242		0.5	0.97654	0.978542	0.980149	0.98134	0.982074	0.982302	0.981969	0.981027	0.97945	0.977261	0.974557	0.971549	0.968609	0.970356	0.980799	0.963096	0.945739	0.928718	0.912028
348	142.136	150.819	-40657.1	-79.2647	-13073	0.0109064		310.5	1.04229		average	0.97654	0.978542	0.980159	0.981386	0.982227	0.982724	0.982999	0.983323	0.984041	0.98468	0.985275	0.985907	0.986686	0.98765	0.98082	0.963095	0.945737	0.928715	0.912023
350	142.935	151.815	-40639.5	-79.2143	-12914.5	0.0118181		311	1.04216
352	143.729	152.812	-40621.6	-79.1632	-12756.1	0.0127939		311.5	1.04203		Gas-liquid partition coefficient	T_P (K)
354	144.518	153.811	-40603.2	-79.1111	-12597.8	0.0138373		312	1.0419		total monomer concentration (mol/L)	298	308	318	328	338	348	358	368	378	388	398
356	145.303	154.81	-40584.4	-79.0581	-12439.7	0.0149521		312.5	1.04177		0.000107636	0.0140037	0.0234827	0.0379364	0.0592534	0.0897589	0.132235	0.189923	0.26651	0.366094	0.493131	0.652368
358	146.083	155.811	-40565.1	-79.0043	-12281.6	0.0161422		313	1.04164		0.00106883	0.0140029	0.0234815	0.0379347	0.059251	0.0897555	0.13223	0.189918	0.266504	0.366087	0.493123	0.652361
360	146.86	156.813	-40545.5	-78.9494	-12123.7	0.0174116		313.5	1.04151		0.0107505	0.0139949	0.0234693	0.0379169	0.059226	0.0897219	0.132187	0.189864	0.26644	0.366015	0.493049	0.652294
362	147.632	157.816	-40525.3	-78.8937	-11965.8	0.0187644		314	1.04138		0.105602	0.0139166	0.0233501	0.0377428	0.0589816	0.089392	0.131759	0.189331	0.265808	0.365308	0.492313	0.651613
364	148.399	158.82	-40504.7	-78.8369	-11808.1	0.0202049		314.5	1.04125		0.958205	0.0132267	0.0222955	0.0361953	0.0567975	0.0864234	0.127872	0.184435	0.259888	0.358472	0.484842	0.644008
366	149.163	159.825	-40483.6	-78.7791	-11650.5	0.0217376		315	1.04112		4.80487	0.0105567	0.0181444	0.0299961	0.0478781	0.0740303	0.111214	0.162743	0.2325	0.324908	0.44487	0.597616
368	149.922	160.831	-40462.1	-78.7203	-11493	0.0233672		315.5	1.04099
370	150.677	161.839	-40440	-78.6605	-11335.6	0.0250982		316	1.04086
372	151.428	193.812	-40386.4	-78.5162	-11178.4	0.0269351		316.5	1.04073
374	152.175	194.342	-40301.9	-78.2895	-11021.6	0.0288811		317	1.0406
376	152.918	194.873	-40217.8	-78.0652	-10865.3	0.0309402		317.5	1.04047
378	153.657	195.403	-40134.1	-77.8432	-10709.3	0.0331173		318	1.04034
380	154.393	195.934	-40050.8	-77.6234	-10553.9	0.0354173		318.5	1.04021
382	155.124	196.465	-39967.9	-77.4059	-10398.9	0.0378452		319	1.04008
384	155.852	196.995	-39885.4	-77.1905	-10244.3	0.0404061		319.5	1.03995
386	156.575	197.526	-39803.3	-76.9773	-10090.1	0.0431053		320	1.03982
388	157.295	198.056	-39721.6	-76.7662	-9936.34	0.0459481		320.5	1.03969
390	158.012	198.587	-39640.3	-76.5571	-9783.02	0.04894		321	1.03956
392	158.724	199.118	-39559.3	-76.35	-9630.11	0.0520865		321.5	1.03943
394	159.433	199.648	-39478.7	-76.1449	-9477.62	0.0553933		322	1.0393
396	160.139	200.179	-39398.4	-75.9417	-9325.53	0.0588661		322.5	1.03917
398	160.841	200.709	-39318.5	-75.7404	-9173.85	0.0625107		323	1.03904
400	161.539	201.24	-39239	-75.541	-9022.57	0.0663332		323.5	1.03891
402	162.234	201.771	-39159.7	-75.3434	-8871.68	0.0703395		324	1.03878
404	162.925	202.301	-39080.8	-75.1476	-8721.19	0.0745357		324.5	1.03865
406	163.613	202.832	-39002.2	-74.9535	-8571.09	0.078928		325	1.03852
408	164.298	203.362	-38923.9	-74.7612	-8421.38	0.0835228		325.5	1.03839
410	164.979	203.893	-38846	-74.5705	-8272.05	0.0883264		326	1.03826
412	165.657	204.424	-38768.3	-74.3815	-8123.09	0.0933452		326.5	1.03813
414	166.332	204.954	-38690.9	-74.1941	-7974.52	0.0985857		327	1.038
416	167.004	205.485	-38613.8	-74.0084	-7826.32	0.104054		327.5	1.03787
418	167.672	206.015	-38537	-73.8241	-7678.48	0.109758		328	1.03774
420	168.337	206.546	-38460.4	-73.6414	-7531.02	0.115704		328.5	1.03761
422	168.999	207.077	-38384.1	-73.4602	-7383.92	0.121898		329	1.03748
424	169.657	207.607	-38308.1	-73.2805	-7237.17	0.128347		329.5	1.03735
426	170.313	208.138	-38232.3	-73.1022	-7090.79	0.135058		330	1.03722
428	170.966	208.668	-38156.8	-72.9253	-6944.76	0.142038		330.5	1.03709
430	171.615	209.199	-38081.5	-72.7498	-6799.09	0.149295		331	1.03696
432	172.262	209.73	-38006.5	-72.5757	-6653.76	0.156834		331.5	1.03683
434	172.905	210.26	-37931.6	-72.4029	-6508.79	0.164664		332	1.0367
436	173.546	210.791	-37857	-72.2314	-6364.15	0.172791		332.5	1.03657
438	174.184	211.321	-37782.7	-72.0612	-6219.86	0.181222		333	1.03644
440	174.818	211.852	-37708.5	-71.8922	-6075.91	0.189964		333.5	1.03631
442	175.45	212.383	-37634.5	-71.7245	-5932.29	0.199026		334	1.03618
444	176.079	212.913	-37560.8	-71.558	-5789.01	0.208413		334.5	1.03605
446	176.705	213.444	-37487.2	-71.3927	-5646.06	0.218133		335	1.03592
448	177.329	213.974	-37413.8	-71.2285	-5503.43	0.228193		335.5	1.03579
450	177.949	214.505	-37340.6	-71.0655	-5361.14	0.238601		336	1.03566
452	178.567	215.036	-37267.6	-70.9035	-5219.17	0.249364		336.5	1.03553
454	179.182	215.566	-37194.7	-70.7427	-5077.52	0.260488		337	1.0354
456	179.795	216.097	-37122	-70.583	-4936.2	0.271982		337.5	1.03527
458	180.405	216.627	-37049.5	-70.4243	-4795.19	0.283852		338	1.03514
460	181.012	217.158	-36977.1	-70.2666	-4654.5	0.296105		338.5	1.03501
462	181.616	217.689	-36904.9	-70.1099	-4514.12	0.308749		339	1.03488
464	182.218	218.219	-36832.8	-69.9543	-4374.06	0.321791		339.5	1.03475
466	182.817	218.75	-36760.9	-69.7996	-4234.31	0.335238		340	1.03462
468	183.414	219.28	-36689.1	-69.6458	-4094.86	0.349097		340.5	1.03449
470	184.008	219.811	-36617.4	-69.493	-3955.72	0.363375		341	1.03436
472	184.6	220.342	-36545.9	-69.3411	-3816.89	0.378079		341.5	1.03423
474	185.189	220.872	-36474.5	-69.1901	-3678.36	0.393216		342	1.0341
476	185.775	221.403	-36403.2	-69.04	-3540.13	0.408794		342.5	1.03397
478	186.36	221.933	-36332	-68.8907	-3402.2	0.424818		343	1.03384
480	186.941	222.464	-36260.9	-68.7423	-3264.56	0.441296		343.5	1.03371
482	187.521	222.995	-36189.9	-68.5947	-3127.23	0.458235		344	1.03358
484	188.097	223.525	-36119	-68.4479	-2990.18	0.475641		344.5	1.03345
486	188.672	224.056	-36048.2	-68.3019	-2853.43	0.493521		345	1.03332
488	189.244	224.586	-35977.4	-68.1567	-2716.98	0.511881		345.5	1.03319
490	189.814	225.117	-35906.8	-68.0122	-2580.81	0.530729		346	1.03306
492	190.382	225.648	-35836.2	-67.8685	-2444.93	0.55007		346.5	1.03293
494	190.947	226.178	-35765.7	-67.7255	-2309.33	0.569911		347	1.0328
496	191.51	226.709	-35695.3	-67.5832	-2174.02	0.590257		347.5	1.03267
498	192.07	227.239	-35624.9	-67.4416	-2039	0.611117		348	1.03254
500	192.629	227.77	-35554.6	-67.3007	-1904.26	0.632494		348.5	1.03241
502	193.185	228.301	-35484.3	-67.1605	-1769.79	0.654396		349	1.03228
504	193.739	228.831	-35414.1	-67.0209	-1635.61	0.676828		349.5	1.03215
506	194.291	229.362	-35344	-66.8819	-1501.71	0.699797		350	1.03202
508	194.84	229.892	-35273.9	-66.7436	-1368.09	0.723307		350.5	1.03189
510	195.388	230.423	-35203.8	-66.6059	-1234.74	0.747365		351	1.03176
512	195.933	230.954	-35133.7	-66.4688	-1101.66	0.771976		351.5	1.03163
514	196.476	231.484	-35063.7	-66.3323	-968.86	0.797145		352	1.0315
516	197.017	232.015	-34993.7	-66.1964	-836.331	0.822878		352.5	1.03137
518	197.556	232.545	-34923.7	-66.061	-704.073	0.849179		353	1.03124
520	198.093	233.076	-34853.7	-65.9262	-572.086	0.876055		353.5	1.03111
522	198.628	233.607	-34783.8	-65.7919	-440.368	0.903509		354	1.03098
524	199.161	234.137	-34713.8	-65.6582	-308.918	0.931547		354.5	1.03085
526	199.692	234.668	-34643.9	-65.5249	-177.735	0.960173		355	1.03072
528	200.22	235.198	-34573.9	-65.3922	-46.8177	0.989392		355.5	1.03059
530	200.747	235.729	-34503.9	-65.2599	83.8345	1.01921		356	1.03046
532	201.272	236.26	-34434	-65.1282	214.223	1.04963		356.5	1.03033
534	201.795	236.79	-34364	-64.9969	344.348	1.08065		357	1.0302
536	202.316	237.321	-34294	-64.866	474.211	1.11228		357.5	1.03007
538	202.835	237.851	-34224	-64.7356	603.812	1.14453		358	1.02994
540	203.351	238.382	-34153.9	-64.6057	733.154	1.17739		358.5	1.02981
542	203.867	238.913	-34083.8	-64.4761	862.235	1.21088		359	1.02968
544	204.38	239.443	-34013.7	-64.347	991.059	1.24499		359.5	1.02955
546	204.891	239.974	-33943.6	-64.2183	1119.62	1.27972		360	1.02942
548	205.4	240.504	-33873.4	-64.09	1247.93	1.31509		360.5	1.02929
550	205.908	241.035	-33803.2	-63.9621	1375.98	1.35109		361	1.02916
552	206.414	241.566	-33732.9	-63.8345	1503.78	1.38773		361.5	1.02903
554	206.918	242.096	-33662.6	-63.7074	1631.32	1.42501		362	1.0289
556	207.42	242.627	-33592.2	-63.5805	1758.61	1.46293		362.5	1.02877
558	207.92	243.157	-33521.7	-63.4541	1885.65	1.50149		363	1.02864
560	208.418	243.688	-33451.2	-63.3279	2012.43	1.5407		363.5	1.02851
562	208.915	244.219	-33380.6	-63.2021	2138.96	1.58056		364	1.02838
564	209.41	244.749	-33310	-63.0767	2265.24	1.62107		364.5	1.02825
566	209.903	245.28	-33239.3	-62.9515	2391.26	1.66223		365	1.02812
568	210.395	245.81	-33168.5	-62.8266	2517.04	1.70405		365.5	1.02799
570	210.884	246.341	-33097.6	-62.7021	2642.57	1.74652		366	1.02786
572	211.372	246.872	-33026.7	-62.5778	2767.85	1.78965		366.5	1.02773
574	211.859	247.402	-32955.6	-62.4538	2892.88	1.83343		367	1.0276
576	212.343	247.933	-32884.5	-62.3301	3017.67	1.87788		367.5	1.02747
578	212.826	248.463	-32813.3	-62.2067	3142.2	1.92298		368	1.02734
580	213.308	248.994	-32741.9	-62.0835	3266.49	1.96875		368.5	1.02721
582	213.787	249.525	-32670.5	-61.9606	3390.54	2.01517		369	1.02708
584	214.265	250.055	-32599	-61.8379	3514.34	2.06226		369.5	1.02695
586	214.741	250.586	-32527.4	-61.7154	3637.89	2.11001		370	1.02682
588	215.216	251.116	-32455.6	-61.5932	3761.2	2.15842		370.5	1.02669
590	215.689	251.647	-32383.8	-61.4712	3884.26	2.20749		371	1.02656
592	216.161	252.178	-32311.8	-61.3494	4007.08	2.25722		371.5	1.02643
594	216.631	252.708	-32239.7	-61.2279	4129.66	2.30762		372	1.0263
596	217.099	253.239	-32167.5	-61.1065	4252	2.35867		372.5	1.02617
598	217.566	253.769	-32095.1	-60.9853	4374.09	2.41038		373	1.02604
600	218.031	254.3	-32022.7	-60.8643	4495.94	2.46275		373.5	0.97579
602	218.495	254.831	-31950	-60.7435	4617.54	2.51578		374	0.97549
604	218.957	255.361	-31877.3	-60.6229	4738.91	2.56946		374.5	0.97519
606	219.417	255.892	-31804.4	-60.5024	4860.04	2.62379		375	0.97489
608	219.876	256.422	-31731.4	-60.3821	4980.92	2.67878		375.5	0.97459
610	220.334	256.953	-31658.2	-60.262	5101.56	2.73442		376	0.97429
612	220.79	257.484	-31584.9	-60.142	5221.97	2.79071		376.5	0.97399
614	221.245	258.014	-31511.5	-60.0221	5342.13	2.84765		377	0.97369
616	221.698	258.545	-31437.8	-59.9024	5462.06	2.90523		377.5	0.97339
618	222.149	259.075	-31364.1	-59.7829	5581.74	2.96345		378	0.97309
620	222.599	259.606	-31290.1	-59.6634	5701.19	3.02231		378.5	0.97279
622	223.048	260.137	-31216	-59.5441	5820.4	3.08181		379	0.97249
624	223.495	260.667	-31141.8	-59.4249	5939.37	3.14194		379.5	0.97219
626	223.941	261.198	-31067.4	-59.3058	6058.1	3.20271		380	0.97189
628	224.386	261.728	-30992.8	-59.1869	6176.59	3.2641		380.5	0.97159
630	224.829	262.259	-30918	-59.068	6294.84	3.32612		381	0.97129
632	225.27	262.79	-30843	-58.9492	6412.86	3.38876		381.5	0.97099
634	225.71	263.32	-30767.9	-58.8305	6530.64	3.45201		382	0.97069
636	226.149	263.851	-30692.6	-58.7119	6648.18	3.51588		382.5	0.97039
638	226.587	264.381	-30617.1	-58.5934	6765.49	3.58037		383	0.97009
640	227.023	264.912	-30541.4	-58.475	6882.56	3.64545		383.5	0.96979
642	227.458	265.443	-30465.5	-58.3566	6999.39	3.71114		384	0.96949
644	227.891	265.973	-30389.5	-58.2383	7115.98	3.77743		384.5	0.96919
646	228.323	266.504	-30313.2	-58.1201	7232.34	3.84431		385	0.96889
648	228.754	267.034	-30236.7	-58.0019	7348.46	3.91177		385.5	0.96859
650	229.183	267.565	-30160.1	-57.8837	7464.35	3.97983		386	0.96829
								387	0.96769
								388	0.96709
								389	0.96649
								390	0.96589
								391	0.96529
								392	0.96469
								393	0.96409
								394	0.96349
								395	0.96289
								396	0.96229
								397	0.96169
								398	0.96109
								399	0.96049
								400	0.95989
								401	0.95929
								402	0.95869
								403	0.95809
								404	0.95749
								405	0.95689
								406	0.95629
								407	0.95569
								408	0.95509
								409	0.95449
								410	0.95389
								411	0.95329
								412	0.95269
								413	0.95209
								414	0.95149
								415	0.95089
								416	0.95029
								417	0.94969
								418	0.94909
								419	0.94849
								420	0.94789
								421	0.94729
								422	0.94669
								423	0.94609
								424	0.94549
								425	0.94489
								426	0.94429
								427	0.94369
								428	0.94309
								429	0.94249
								430	0.94189
								431	0.94129
								432	0.94069
								433	0.94009
								434	0.93949
								435	0.93889
								436	0.93829
								437	0.93769
								438	0.93709
								439	0.93649
								440	0.93589
								441	0.93529
								442	0.93469
								443	0.93409
								444	0.93349
								445	0.93289
								446	0.93229
								447	0.93169
								448	0.93109
								449	0.93049
								450	0.92989
								451	0.92929
								452	0.92869
								453	0.92809
								454	0.92749
								455	0.92689
								456	0.92629
								457	0.92569
								458	0.92509
								459	0.92449
								460	0.92389
								461	0.92329
								462	0.92269
								463	0.92209
								464	0.92149
								465	0.92089
								466	0.92029
								467	0.91969
								468	0.91909
								469	0.91849
								470	0.91789
								471	0.91729
								472	0.91669
								473	0.91609
								474	0.91549
								475	0.91489
								476	0.91429
								477	0.91369
								478	0.91309
								479	0.91249
								480	0.91189
								481	0.91129
								482	0.91069
								483	0.91009
								484	0.90949
								485	0.90889
								486	0.90829
								487	0.90769
								488	0.90709
								489	0.90649
								490	0.90589
								491	0.90529
								492	0.90469
								493	0.90409
								494	0.90349
								495	0.90289
								496	0.90229
								497	0.90169
								498	0.90109
								499	0.90049
								500	0.89989
								501	0.89929
								502	0.89869
								503	0.89809
								504	0.89749
								505	0.89689
								506	0.89629
								507	0.89569
								508	0.89509
								509	0.89449
								510	0.89389
								511	0.89329
								512	0.89269
								513	0.89209
								514	0.89149
								515	0.89089
								516	0.89029
								517	0.88969
								518	0.88909
								519	0.88849
								520	0.88789
								521	0.88729
								522	0.88669
								523	0.88609
								524	0.88549
								525	0.88489
								526	0.88429
								527	0.88369
								528	0.88309
								529	0.88249
								530	0.88189
								531	0.88129
								532	0.88069
								533	0.88009
								534	0.87949
								535	0.87889
								536	0.87829
								537	0.87769
								538	0.87709
								539	0.87649
								540	0.87589
								541	0.87529
								542	0.87469
								543	0.87409
								544	0.87349
								545	0.87289
								546	0.87229
								547	0.87169
								548	0.87109
								549	0.87049
								550	0.86989
								551	0.86929
								552	0.86869
								553	0.86809
								554	0.86749
								555	0.86689
								556	0.86629
								557	0.86569
								558	0.86509
								559	0.86449
								560	0.86389
								561	0.86329
								562	0.86269
								563	0.86209
								564	0.86149
								565	0.86089
								566	0.86029
								567	0.85969
								568	0.85909
								569	0.85849
								570	0.85789
								571	0.85729
								572	0.85669
								573	0.85609
								574	0.85549
								575	0.85489
								576	0.85429
								577	0.85369
								578	0.85309
								579	0.85249
								580	0.85189
								581	0.85129
								582	0.85069
								583	0.85009
								584	0.84949
								585	0.84889
								586	0.84829
								587	0.84769
								588	0.84709
								589	0.84649
								590	0.84589
								591	0.84529
								592	0.84469
								593	0.84409
								594	0.84349
								595	0.84289
								596	0.84229
								597	0.84169
								598	0.84109
								599	0.84049
								600	0.83989

## Sheet: PP
Temperature	Propylene heat capacity	(Crystalline) Poly(propylene) heat capacity	Enthalpy of propagation (crystalline PP)	Entropy of propagation (crystalline PP)	Gibbs energy of propagation (crystalline PP)	Depolymerization equilibrium constant (crystalline PP)	(Amorphous) Poly(propylene) heat capacity	Enthalpy of propagation (amorphous PP)	Entropy of propagation (amorphous PP)	Gibbs energy of propagation (amorphous PP)	Depolymerization equilibrium constant (amorphous PP)		fugacity coefficient	P = 1 atm														T_G = 298
(K)	(J/molK)	(J/molK)	(J/mol)	(J/molK)	(J/mol)	(a.u.)	(J/molK)	(J/mol)	(J/molK)	(J/mol)	(a.u.)			T_G (K)														P (atm)
298	64.4815	67.7097	-51672.4	-89.3284	-25052.5	4.06005e-05	88.0584	-51672.4	-89.3284	-25052.5	4.06005e-05		mol fraction styrene	273	283	293	303	313	323	333	343	353	363	373	383	393	403	1	2	3	4	5
300	64.8164	68.239	-51665.7	-89.3062	-24873.9	4.66565e-05	88.361	-51625.3	-89.1708	-24874	4.6654e-05		0.005	0.991089	0.991985	0.992776	0.993478	0.994103	0.994661	0.995161	0.995609	0.996013	0.996377	0.996706	0.997005	0.997275	0.997522	0.993138	0.986333	0.979585	0.972894	0.966259
302	65.1507	68.773	-51658.7	-89.2828	-24695.3	5.35162e-05	88.6636	-51578.2	-89.0145	-24695.9	5.35047e-05		0.01	0.990992	0.991896	0.992695	0.993403	0.994034	0.994597	0.995101	0.995553	0.995961	0.996328	0.996661	0.996962	0.997236	0.997485	0.993059	0.986177	0.979352	0.972586	0.965876
304	65.4845	69.3116	-51651.3	-89.2582	-24516.8	6.12726e-05	88.9662	-51531.2	-88.8594	-24518	6.12434e-05		0.015	0.990896	0.991808	0.992613	0.993328	0.993964	0.994532	0.995041	0.995498	0.995909	0.99628	0.996616	0.99692	0.997196	0.997447	0.992981	0.986021	0.979121	0.972278	0.965494
306	65.8177	69.8547	-51643.4	-89.2324	-24338.3	7.00278e-05	89.2688	-51484.3	-88.7055	-24340.4	6.99691e-05		0.02	0.9908	0.99172	0.992532	0.993253	0.993895	0.994468	0.994982	0.995442	0.995857	0.996232	0.996571	0.996878	0.997157	0.99741	0.992903	0.985867	0.97889	0.971973	0.965114
308	66.1503	70.4021	-51635.1	-89.2054	-24159.8	7.98936e-05	89.5714	-51437.4	-88.5528	-24163.2	7.97903e-05		0.025	0.990705	0.991632	0.992452	0.993179	0.993826	0.994405	0.994922	0.995387	0.995806	0.996184	0.996526	0.996836	0.997117	0.997373	0.992826	0.985713	0.978661	0.971669	0.964737
310	66.4824	70.9538	-51626.4	-89.1772	-23981.5	9.09925e-05	89.874	-51390.6	-88.4013	-23986.2	9.08253e-05		0.03	0.99061	0.991545	0.992372	0.993105	0.993758	0.994341	0.994864	0.995333	0.995755	0.996136	0.996481	0.996794	0.997078	0.997337	0.992749	0.98556	0.978433	0.971367	0.964361
312	66.8139	71.5096	-51617.2	-89.1477	-23803.1	0.000103458	90.1766	-51343.9	-88.251	-23809.5	0.000103203		0.035	0.990516	0.991458	0.992292	0.993031	0.99369	0.994278	0.994805	0.995278	0.995705	0.996089	0.996437	0.996753	0.997039	0.9973	0.992673	0.985408	0.978206	0.971066	0.963987
314	67.1449	72.0694	-51607.6	-89.1169	-23624.9	0.000117437	90.4792	-51297.2	-88.1018	-23633.2	0.000117063		0.04	0.990422	0.991372	0.992213	0.992958	0.993622	0.994216	0.994747	0.995224	0.995654	0.996042	0.996393	0.996712	0.997001	0.997264	0.992596	0.985257	0.97798	0.970766	0.963615
316	67.4753	72.6331	-51597.5	-89.0849	-23446.7	0.000133088	90.7818	-51250.5	-87.9537	-23457.1	0.000132558		0.045	0.990328	0.991286	0.992134	0.992886	0.993555	0.994153	0.994689	0.99517	0.995604	0.995995	0.996349	0.996671	0.996962	0.997228	0.992521	0.985106	0.977755	0.970469	0.963245
318	67.8051	73.2007	-51587	-89.0516	-23268.5	0.000150583	91.0844	-51203.9	-87.8068	-23281.4	0.000149853		0.05	0.990235	0.991201	0.992055	0.992813	0.993488	0.994091	0.994631	0.995117	0.995554	0.995949	0.996306	0.99663	0.996924	0.997192	0.992445	0.984956	0.977532	0.970172	0.962877
320	68.1344	73.7721	-51575.9	-89.0171	-23090.5	0.000170111	91.387	-51157.4	-87.6609	-23105.9	0.000169126		0.055	0.990143	0.991116	0.991977	0.992741	0.993422	0.99403	0.994574	0.995064	0.995504	0.995902	0.996263	0.996589	0.996886	0.997156	0.99237	0.984807	0.97731	0.969878	0.962511
322	68.4631	74.347	-51564.4	-88.9812	-22912.5	0.000191876	91.6896	-51110.9	-87.5161	-22930.7	0.000190571		0.06	0.990051	0.991032	0.991899	0.992669	0.993355	0.993968	0.994517	0.995011	0.995455	0.995856	0.996219	0.996549	0.996848	0.997121	0.992296	0.984659	0.977089	0.969585	0.962147
324	68.7913	74.9256	-51552.4	-88.944	-22734.5	0.000216097	91.9922	-51064.5	-87.3724	-22755.8	0.000214395		0.065	0.98996	0.990948	0.991822	0.992598	0.993289	0.993907	0.994461	0.994958	0.995406	0.99581	0.996177	0.996509	0.996811	0.997086	0.992222	0.984511	0.976869	0.969293	0.961784
326	69.1189	75.5075	-51539.9	-88.9054	-22556.7	0.000243016	92.2948	-51018.1	-87.2297	-22581.2	0.000240824		0.07	0.989869	0.990864	0.991745	0.992527	0.993224	0.993846	0.994404	0.994905	0.995357	0.995765	0.996134	0.996469	0.996773	0.99705	0.992148	0.984365	0.97665	0.969003	0.961424
328	69.4459	76.0929	-51526.8	-88.8656	-22378.9	0.000272888	92.5974	-50971.8	-87.088	-22406.9	0.0002701		0.075	0.989778	0.990781	0.991669	0.992457	0.993159	0.993786	0.994348	0.994853	0.995308	0.995719	0.996092	0.996429	0.996736	0.997015	0.992074	0.984219	0.976432	0.968715	0.961065
330	69.7724	76.6816	-51513.3	-88.8244	-22201.2	0.000305993	92.9	-50925.5	-86.9473	-22232.9	0.000302482		0.08	0.989688	0.990699	0.991593	0.992387	0.993094	0.993726	0.994292	0.994801	0.99526	0.995674	0.996049	0.99639	0.996699	0.996981	0.992001	0.984073	0.976216	0.968428	0.960709
332	70.0983	77.2735	-51499.2	-88.7818	-22023.6	0.000342631	93.2026	-50879.3	-86.8077	-22059.1	0.000338251		0.085	0.989599	0.990617	0.991517	0.992317	0.993029	0.993666	0.994237	0.99475	0.995212	0.995629	0.996007	0.99635	0.996662	0.996946	0.991929	0.983929	0.976	0.968142	0.960354
334	70.4237	77.8685	-51484.6	-88.7379	-21846.1	0.000383124	93.5052	-50833.1	-86.669	-21885.7	0.000377705		0.09	0.98951	0.990535	0.991442	0.992248	0.992965	0.993607	0.994182	0.994698	0.995164	0.995585	0.995966	0.996311	0.996625	0.996912	0.991857	0.983786	0.975786	0.967858	0.960001
336	70.7485	78.4666	-51469.4	-88.6926	-21668.7	0.00042782	93.8078	-50787	-86.5312	-21712.5	0.000421167		0.095	0.989421	0.990454	0.991367	0.992179	0.992902	0.993548	0.994127	0.994647	0.995117	0.99554	0.995924	0.996272	0.996589	0.996877	0.991785	0.983643	0.975573	0.967576	0.95965
338	71.0727	79.0677	-51453.7	-88.646	-21491.3	0.000477091	94.1104	-50740.9	-86.3944	-21539.5	0.000468978		0.1	0.989333	0.990373	0.991293	0.99211	0.992838	0.993489	0.994072	0.994597	0.995069	0.995496	0.995883	0.996234	0.996553	0.996843	0.991713	0.983501	0.975362	0.967295	0.959301
340	71.3964	79.6717	-51437.4	-88.598	-21314.1	0.000531337	94.413	-50694.8	-86.2586	-21366.9	0.000521507		0.2	0.987673	0.98885	0.989891	0.990817	0.991643	0.992382	0.993044	0.993641	0.994178	0.994665	0.995106	0.995506	0.99587	0.996203	0.990368	0.980824	0.971368	0.961999	0.952717
342	71.7195	80.2786	-51420.6	-88.5486	-21136.9	0.000590986	94.7156	-50648.8	-86.1236	-21194.5	0.000579144		0.3	0.986207	0.987504	0.988653	0.989675	0.990587	0.991404	0.992137	0.992796	0.993392	0.993931	0.994419	0.994863	0.995268	0.995637	0.989179	0.978457	0.967833	0.957305	0.946875
344	72.0421	80.8883	-51403.2	-88.4979	-20959.9	0.000656495	95.0182	-50602.8	-85.9896	-21022.4	0.000642307		0.4	0.984933	0.986335	0.987578	0.988684	0.989671	0.990555	0.991349	0.992064	0.99271	0.993294	0.993824	0.994306	0.994746	0.995147	0.988147	0.976398	0.964753	0.953209	0.941767
346	72.3641	81.5007	-51385.2	-88.4458	-20783	0.000728354	95.3208	-50556.9	-85.8565	-20850.5	0.000711442		0.5	0.983851	0.985344	0.986667	0.987844	0.988895	0.989836	0.990682	0.991443	0.992131	0.992755	0.99332	0.993834	0.994303	0.994731	0.987272	0.974648	0.962128	0.949709	0.937392
348	72.6855	82.1157	-51366.6	-88.3923	-20606.1	0.000807086	95.6234	-50511	-85.7242	-20679	0.00078702		average	0.989442	0.990473	0.991385	0.992195	0.992917	0.993562	0.99414	0.99466	0.995128	0.995551	0.995935	0.996282	0.996598	0.996886	0.991802	0.983676	0.97562	0.967635	0.959719
350	73.0064	82.7334	-51347.5	-88.3374	-20429.4	0.000893245	95.926	-50465.1	-85.5928	-20507.6	0.000869544
352	73.3267	83.3536	-51327.7	-88.2811	-20252.8	0.000987427	96.2286	-50419.3	-85.4623	-20336.6	0.000959547		Gas-liquid partition coefficient	T_P (K)
354	73.6465	83.9763	-51307.4	-88.2234	-20076.3	0.00109026	96.5312	-50373.5	-85.3326	-20165.8	0.00105759		total monomer concentration (mol/L)	298	308	318	328	338	348	358	368	378	388	398
356	73.9657	84.6014	-51286.4	-88.1644	-19899.9	0.00120242	96.8338	-50327.8	-85.2037	-19995.3	0.00116429		0.00589183	9.62805	11.8124	14.2555	16.9489	19.8795	23.03	26.3793	29.9035	33.576	37.3683	41.2506
358	74.2843	85.2289	-51264.8	-88.1039	-19723.6	0.00132461	97.1364	-50282	-85.0756	-19825	0.00128025		0.0582644	9.62963	11.8142	14.2575	16.9512	19.882	23.0326	26.3821	29.9064	33.5789	37.3712	41.2533
360	74.6024	85.8588	-51242.6	-88.0421	-19547.5	0.00145759	97.439	-50236.4	-84.9484	-19655	0.00140617		0.562647	9.64315	11.8298	14.2751	16.9706	19.9031	23.0553	26.4059	29.931	33.6038	37.3957	41.2765
362	74.9199	86.4909	-51219.8	-87.9789	-19371.4	0.00160216	97.7416	-50190.7	-84.8219	-19485.2	0.00154274		3.97331	9.68638	11.8794	14.3308	17.0319	19.9693	23.1256	26.4792	30.0056	33.6778	37.4663	41.3404
364	75.2369	87.1252	-51196.3	-87.9142	-19195.5	0.00175916	98.0442	-50145.1	-84.6962	-19315.7	0.00169071		10.2227	9.69628	11.8912	14.3442	17.0466	19.985	23.1416	26.4948	30.0199	33.6893	37.4733	41.3406
366	75.5533	87.7617	-51172.2	-87.8482	-19019.8	0.0019295	98.3468	-50099.5	-84.5712	-19146.4	0.00185086		12.1117	9.69528	11.8902	14.3432	17.0455	19.9837	23.14	26.4929
368	75.8691	88.4004	-51147.5	-87.7808	-18844.2	0.00211411	98.6494	-50053.9	-84.4471	-18977.4	0.00202403		average	9.66313	11.8529	14.301	16.9991	19.9338	23.0875	26.439	29.9533	33.6251	37.415	41.2923
370	76.1844	89.0411	-51122.1	-87.712	-18668.7	0.00231399	98.952	-50008.3	-84.3236	-18808.6	0.00221108
372	76.4991	89.6838	-51096.1	-87.6418	-18493.3	0.0025302	99.2546	-49962.8	-84.2009	-18640.1	0.00241293
374	76.8133	90.3286	-51069.4	-87.5702	-18318.1	0.00276385	99.5572	-49917.3	-84.0789	-18471.8	0.00263055
376	77.1269	90.9753	-51042	-87.4973	-18143	0.00301609	99.8598	-49871.9	-83.9577	-18303.8	0.00286493
378	77.4399	91.6239	-51014	-87.4229	-17968.1	0.00328816	100.162	-49826.4	-83.8371	-18136	0.00311714
380	77.7524	92.2744	-50985.3	-87.3472	-17793.3	0.00358135	100.465	-49781	-83.7172	-17968.4	0.00338828
382	78.0643	92.9267	-50955.9	-87.27	-17618.7	0.003897	100.768	-49735.5	-83.598	-17801.1	0.00367952
384	78.3757	93.5808	-50925.8	-87.1915	-17444.3	0.00423654	101.07	-49690.1	-83.4795	-17634	0.00399206
386	78.6865	94.2367	-50895.1	-87.1116	-17270	0.00460145	101.373	-49644.8	-83.3616	-17467.2	0.00432718
388	78.9967	94.8943	-50863.6	-87.0304	-17095.8	0.00499329	101.675	-49599.4	-83.2444	-17300.6	0.00468618
390	79.3064	95.5535	-50831.5	-86.9477	-16921.8	0.00541367	101.978	-49554.1	-83.1278	-17134.2	0.00507046
392	79.6155	96.2145	-50798.6	-86.8637	-16748	0.00586432	102.281	-49508.7	-83.0119	-16968.1	0.00548145
394	79.9241	96.877	-50765.1	-86.7784	-16574.4	0.00634699	102.583	-49463.4	-82.8965	-16802.2	0.00592065
396	80.2321	97.5411	-50730.8	-86.6916	-16400.9	0.00686354	102.886	-49418.1	-82.7818	-16636.5	0.00638962
398	80.5395	98.2068	-50695.8	-86.6035	-16227.6	0.00741591	103.188	-49372.8	-82.6677	-16471	0.00688997
400	80.8464	98.874	-50660.1	-86.5141	-16054.5	0.00800611	103.491	-49327.5	-82.5542	-16305.8	0.0074234
402	81.1527	99.5427	-50623.7	-86.4232	-15881.6	0.00863622	103.794	-49282.2	-82.4412	-16140.8	0.00799166
404	81.4585	100.213	-50586.6	-86.3311	-15708.8	0.00930844	104.096	-49236.9	-82.3289	-15976	0.00859655
406	81.7637	100.884	-50548.7	-86.2376	-15536.2	0.010025	104.399	-49191.6	-82.2171	-15811.5	0.00923997
408	82.0683	101.557	-50510.1	-86.1427	-15363.9	0.0107883	104.701	-49146.4	-82.1059	-15647.2	0.00992388
410	82.3724	102.232	-50470.7	-86.0465	-15191.7	0.0116008	105.004	-49101.1	-81.9952	-15483.1	0.0106503
412	82.6759	102.908	-50430.6	-85.9489	-15019.7	0.0124649	105.307	-49055.8	-81.8851	-15319.2	0.0114213
414	82.9789	103.585	-50389.8	-85.8501	-14847.9	0.0133834	105.609	-49010.6	-81.7755	-15155.5	0.0122391
416	83.2813	104.263	-50348.2	-85.7499	-14676.3	0.0143589	105.912	-48965.3	-81.6664	-14992.1	0.0131058
418	83.5831	104.943	-50305.9	-85.6483	-14504.9	0.0153942	106.214	-48920.1	-81.5579	-14828.9	0.0140239
420	83.8844	105.623	-50262.8	-85.5455	-14333.7	0.0164923	106.517	-48874.8	-81.4499	-14665.9	0.0149957
422	84.1851	106.306	-50218.9	-85.4413	-14162.7	0.0176561	106.82	-48829.5	-81.3423	-14503.1	0.0160237
424	84.4853	106.989	-50174.3	-85.3358	-13991.9	0.0188888	107.122	-48784.3	-81.2353	-14340.5	0.0171104
426	84.7849	107.673	-50128.9	-85.229	-13821.4	0.0201935	107.425	-48739	-81.1288	-14178.1	0.0182585
428	85.0839	108.359	-50082.7	-85.1209	-13651	0.0215736	107.727	-48693.7	-81.0227	-14016	0.0194706
430	85.3824	109.046	-50035.8	-85.0115	-13480.9	0.0230324	108.03	-48648.4	-80.9172	-13854	0.0207495
432	85.6803	109.734	-49988.1	-84.9007	-13311	0.0245735	108.333	-48603.1	-80.8121	-13692.3	0.0220981
434	85.9777	110.423	-49939.6	-84.7887	-13141.3	0.0262004	108.635	-48557.8	-80.7074	-13530.8	0.0235194
436	86.2745	111.113	-49890.3	-84.6754	-12971.8	0.0279168	108.938	-48512.5	-80.6032	-13369.5	0.0250163
438	86.5707	111.804	-49840.2	-84.5609	-12802.6	0.0297267	109.24	-48467.1	-80.4995	-13208.4	0.026592
440	86.8664	112.496	-49789.4	-84.445	-12633.6	0.0316338	109.543	-48421.8	-80.3962	-13047.5	0.0282496
442	87.1615	113.189	-49737.7	-84.3279	-12464.8	0.0336421	109.846	-48376.4	-80.2933	-12886.8	0.0299924
444	87.4561	113.883	-49685.3	-84.2095	-12296.3	0.0357559	110.148	-48331.1	-80.1909	-12726.3	0.0318239
446	87.7501	114.579	-49632	-84.0898	-12128	0.0379792	110.451	-48285.7	-80.0889	-12566	0.0337473
448	88.0435	115.275	-49577.9	-83.9688	-11959.9	0.0403165	110.753	-48240.3	-79.9873	-12405.9	0.0357663
450	88.3364	115.972	-49523.1	-83.8466	-11792.1	0.0427722	111.056	-48194.8	-79.8861	-12246.1	0.0378845
452	88.6287	116.67	-49467.4	-83.7232	-11624.5	0.0453507	111.359	-48149.4	-79.7854	-12086.4	0.0401056
454	88.9205	117.369	-49410.9	-83.5985	-11457.2	0.0480566	111.661	-48103.9	-79.685	-11926.9	0.0424332
456	89.2117	118.069	-49353.6	-83.4725	-11290.1	0.0508948	111.964	-48058.4	-79.585	-11767.7	0.0448714
458	89.5023	118.769	-49295.5	-83.3454	-11123.3	0.0538701	112.266	-48012.9	-79.4854	-11608.6	0.0474241
460	89.7924	119.471	-49236.5	-83.2169	-10956.7	0.0569873	112.569	-47967.4	-79.3862	-11449.7	0.0500953
462	90.0819	120.173	-49176.8	-83.0873	-10790.4	0.0602515	112.872	-47921.8	-79.2873	-11291	0.0528891
464	90.3709	120.877	-49116.2	-82.9564	-10624.4	0.0636677	113.174	-47876.2	-79.1889	-11132.6	0.0558097
466	90.6593	121.581	-49054.7	-82.8243	-10458.6	0.0672413	113.477	-47830.6	-79.0908	-10974.3	0.0588615
468	90.9471	122.286	-48992.5	-82.691	-10293.1	0.0709775	113.779	-47784.9	-78.993	-10816.2	0.0620487
470	91.2344	122.991	-48929.4	-82.5565	-10127.8	0.0748816	114.082	-47739.3	-78.8956	-10658.3	0.065376
472	91.5211	123.698	-48865.5	-82.4207	-9962.87	0.0789592	114.385	-47693.5	-78.7986	-10500.6	0.0688478
474	91.8073	124.405	-48800.7	-82.2838	-9798.17	0.0832159	114.687	-47647.8	-78.7018	-10343.1	0.0724687
476	92.0929	125.113	-48735.1	-82.1456	-9633.74	0.0876572	114.99	-47602	-78.6055	-10185.8	0.0762435
478	92.3779	125.822	-48668.6	-82.0063	-9469.59	0.092289	115.292	-47556.2	-78.5094	-10028.7	0.0801769
480	92.6624	126.531	-48601.3	-81.8658	-9305.71	0.097117	115.595	-47510.4	-78.4137	-9871.78	0.0842739
482	92.9463	127.241	-48533.1	-81.7241	-9142.12	0.102147	115.898	-47464.5	-78.3183	-9715.04	0.0885394
484	93.2297	127.952	-48464.1	-81.5812	-8978.82	0.107385	116.2	-47418.6	-78.2233	-9558.5	0.0929785
486	93.5125	128.664	-48394.2	-81.4371	-8815.8	0.112838	116.503	-47372.6	-78.1285	-9402.15	0.0975962
488	93.7947	129.376	-48323.5	-81.2918	-8653.07	0.118511	116.805	-47326.6	-78.034	-9245.99	0.102398
490	94.0764	130.089	-48251.9	-81.1454	-8490.64	0.12441	117.108	-47280.6	-77.9399	-9090.01	0.107388
492	94.3575	130.803	-48179.4	-80.9979	-8328.49	0.130542	117.411	-47234.5	-77.846	-8934.23	0.112574
494	94.6381	131.517	-48106.1	-80.8491	-8166.65	0.136912	117.713	-47188.3	-77.7524	-8778.63	0.117959
496	94.9181	132.232	-48031.9	-80.6992	-8005.1	0.143529	118.016	-47142.2	-77.6592	-8623.22	0.123549
498	95.1975	132.948	-47956.9	-80.5482	-7843.85	0.150397	118.318	-47095.9	-77.5662	-8467.99	0.129351
500	95.4764	133.664	-47880.9	-80.396	-7682.9	0.157523	118.621	-47049.7	-77.4735	-8312.95	0.135369
502	95.7547	134.381	-47804.1	-80.2427	-7522.27	0.164914	118.924	-47003.4	-77.381	-8158.1	0.14161
504	96.0325	135.098	-47726.4	-80.0883	-7361.94	0.172576	119.226	-46957	-77.2888	-8003.43	0.148079
506	96.3097	135.816	-47647.8	-79.9327	-7201.91	0.180516	119.529	-46910.6	-77.1969	-7848.94	0.154782
508	96.5863	136.535	-47568.4	-79.776	-7042.21	0.188741	119.831	-46864.1	-77.1053	-7694.64	0.161725
510	96.8624	137.254	-47488.1	-79.6181	-6882.81	0.197256	120.134	-46817.6	-77.0139	-7540.52	0.168914
512	97.1379	137.973	-47406.8	-79.4592	-6723.73	0.20607	120.437	-46771	-76.9228	-7386.58	0.176355
514	97.4129	138.694	-47324.7	-79.2991	-6564.98	0.215188	120.739	-46724.4	-76.8319	-7232.83	0.184054
516	97.6873	139.414	-47241.7	-79.1379	-6406.54	0.224617	121.042	-46677.7	-76.7412	-7079.26	0.192018
518	97.9611	140.136	-47157.8	-78.9756	-6248.43	0.234364	121.344	-46631	-76.6508	-6925.86	0.200252
520	98.2344	140.858	-47073	-78.8122	-6090.64	0.244436	121.647	-46584.2	-76.5607	-6772.65	0.208763
522	98.5071	141.58	-46987.3	-78.6478	-5933.18	0.25484	121.95	-46537.3	-76.4707	-6619.62	0.217558
524	98.7793	142.303	-46900.7	-78.4822	-5776.05	0.265581	122.252	-46490.4	-76.381	-6466.77	0.226642
526	99.0509	143.026	-46813.2	-78.3155	-5619.25	0.276667	122.555	-46443.5	-76.2916	-6314.1	0.236022
528	99.3219	143.75	-46724.8	-78.1478	-5462.79	0.288105	122.857	-46396.4	-76.2023	-6161.6	0.245706
530	99.5924	144.475	-46635.5	-77.9789	-5306.66	0.299901	123.16	-46349.3	-76.1133	-6009.29	0.255698
532	99.8623	145.2	-46545.3	-77.809	-5150.87	0.312062	123.463	-46302.1	-76.0244	-5857.15	0.266007
534	100.132	145.925	-46454.1	-77.6381	-4995.42	0.324595	123.765	-46254.9	-75.9358	-5705.19	0.276638
536	100.4	146.651	-46362.1	-77.466	-4840.32	0.337505	124.068	-46207.6	-75.8474	-5553.41	0.287598
538	100.669	147.377	-46269.1	-77.2929	-4685.56	0.350801	124.37	-46160.2	-75.7592	-5401.8	0.298895
540	100.936	148.104	-46175.3	-77.1187	-4531.15	0.364487	124.673	-46112.8	-75.6712	-5250.37	0.310534
542	101.204	148.831	-46080.5	-76.9435	-4377.09	0.378571	124.976	-46065.3	-75.5834	-5099.12	0.322523
544	101.47	149.559	-45984.8	-76.7672	-4223.38	0.39306	125.278	-46017.7	-75.4957	-4948.04	0.334869
546	101.736	150.287	-45888.1	-76.5899	-4070.02	0.407958	125.581	-45970.1	-75.4083	-4797.13	0.347578
548	102.002	151.015	-45790.6	-76.4116	-3917.02	0.423274	125.883	-45922.3	-75.321	-4646.4	0.360657
550	102.266	151.744	-45692.1	-76.2322	-3764.37	0.439012	126.186	-45874.5	-75.234	-4495.85	0.374115
552	102.531	152.474	-45592.6	-76.0517	-3612.09	0.45518	126.489	-45826.7	-75.1471	-4345.47	0.387956
554	102.794	153.203	-45492.3	-75.8703	-3460.17	0.471782	126.791	-45778.7	-75.0604	-4195.26	0.402189
556	103.058	153.933	-45391	-75.6878	-3308.61	0.488826	127.094	-45730.7	-74.9738	-4045.23	0.41682
558	103.32	154.664	-45288.8	-75.5042	-3157.42	0.506316	127.396	-45682.6	-74.8874	-3895.36	0.431857
560	103.582	155.395	-45185.6	-75.3197	-3006.6	0.524259	127.699	-45634.4	-74.8012	-3745.68	0.447306
562	103.844	156.126	-45081.5	-75.1342	-2856.14	0.542661	128.002	-45586.1	-74.7152	-3596.16	0.463176
564	104.105	156.858	-44976.5	-74.9476	-2706.06	0.561527	128.304	-45537.7	-74.6293	-3446.81	0.479472
566	104.365	157.59	-44870.5	-74.76	-2556.35	0.580861	128.607	-45489.3	-74.5436	-3297.64	0.496202
568	104.625	158.323	-44763.6	-74.5714	-2407.02	0.600671	128.909	-45440.8	-74.458	-3148.64	0.513373
570	104.884	159.056	-44655.7	-74.3819	-2258.07	0.62096	129.212	-45392.2	-74.3725	-2999.81	0.530992
572	105.143	159.789	-44546.9	-74.1913	-2109.49	0.641735	129.515	-45343.5	-74.2872	-2851.15	0.549067
574	105.401	160.522	-44437.1	-73.9997	-1961.3	0.662999	129.817	-45294.7	-74.2021	-2702.66	0.567605
576	105.659	161.256	-44326.4	-73.8072	-1813.5	0.684758	130.12	-45245.8	-74.1171	-2554.34	0.586612
578	105.916	161.99	-44214.8	-73.6136	-1666.08	0.707016	130.422	-45196.8	-74.0322	-2406.19	0.606096
580	106.172	162.725	-44102.1	-73.4191	-1519.04	0.729778	130.725	-45147.8	-73.9475	-2258.21	0.626064
582	106.428	163.46	-43988.5	-73.2236	-1372.4	0.753047	131.028	-45098.6	-73.8629	-2110.4	0.646523
584	106.684	164.195	-43874	-73.0271	-1226.15	0.77683	131.33	-45049.4	-73.7784	-1962.76	0.667481
586	106.938	164.931	-43758.5	-72.8297	-1080.29	0.801128	131.633	-45000	-73.6941	-1815.29	0.688944
588	107.193	165.667	-43642	-72.6313	-934.831	0.825946	131.935	-44950.6	-73.6099	-1667.98	0.710919
590	107.446	166.403	-43524.6	-72.4319	-789.768	0.851288	132.238	-44901.1	-73.5258	-1520.85	0.733414
592	107.7	167.14	-43406.2	-72.2316	-645.105	0.877158	132.541	-44851.4	-73.4418	-1373.88	0.756436
594	107.952	167.877	-43286.8	-72.0303	-500.843	0.903557	132.843	-44801.7	-73.3579	-1227.08	0.779992
596	108.204	168.614	-43166.5	-71.8281	-356.984	0.930491	133.146	-44751.9	-73.2742	-1080.45	0.804088
598	108.456	169.351	-43045.2	-71.6249	-213.531	0.95796	133.448	-44701.9	-73.1905	-933.985	0.828733
600	108.706	170.089	-42922.9	-71.4207	-70.4858	0.985969	133.751	-44651.9	-73.107	-787.687	0.853932
602	108.957	170.827	-42799.7	-71.2156	72.1506	1.01452	134.054	-44601.7	-73.0236	-641.556	0.879693
604	109.206	171.565	-42675.4	-71.0096	214.376	1.04361	134.356	-44551.5	-72.9402	-495.593	0.906023
606	109.456	172.304	-42550.2	-70.8027	356.188	1.07326	134.659	-44501.1	-72.857	-349.795	0.932928
608	109.704	173.043	-42424	-70.5948	497.586	1.10344	134.961	-44450.7	-72.7739	-204.164	0.960415
610	109.952	173.782	-42296.9	-70.386	638.566	1.13418	135.264	-44400.1	-72.6908	-58.6998	0.988492
612	110.2	174.522	-42168.7	-70.1762	779.129	1.16547	135.567	-44349.4	-72.6079	86.599	1.01717
614	110.447	175.262	-42039.6	-69.9656	919.27	1.19731	135.869	-44298.6	-72.525	231.732	1.04644
616	110.693	176.002	-41909.5	-69.754	1058.99	1.22971	136.172	-44247.7	-72.4423	376.699	1.07633
618	110.939	176.742	-41778.4	-69.5415	1198.29	1.26266	136.474	-44196.7	-72.3596	521.501	1.10683
620	111.184	177.482	-41646.3	-69.3281	1337.15	1.29616	136.777	-44145.6	-72.277	666.138	1.13795
622	111.429	178.223	-41513.2	-69.1138	1475.6	1.33022	137.08	-44094.4	-72.1945	810.609	1.1697
624	111.673	178.964	-41379.1	-68.8985	1613.61	1.36483	137.382	-44043	-72.112	954.916	1.20209
626	111.917	179.706	-41244	-68.6824	1751.19	1.4	137.685	-43991.5	-72.0297	1099.06	1.23512
628	112.16	180.447	-41107.9	-68.4654	1888.34	1.43572	137.987	-43939.9	-71.9474	1243.03	1.2688
630	112.402	181.189	-40970.8	-68.2475	2025.05	1.472	138.29	-43888.2	-71.8652	1386.85	1.30314
632	112.644	181.931	-40832.8	-68.0286	2161.33	1.50883	138.593	-43836.4	-71.783	1530.5	1.33813
634	112.886	182.673	-40693.7	-67.8089	2297.16	1.54621	138.895	-43784.4	-71.7009	1673.98	1.3738
636	113.126	183.416	-40553.6	-67.5883	2432.56	1.58414	139.198	-43732.3	-71.6189	1817.3	1.41013
638	113.367	184.159	-40412.5	-67.3669	2567.52	1.62262	139.5	-43680.1	-71.537	1960.46	1.44715
640	113.606	184.902	-40270.5	-67.1445	2702.03	1.66165	139.803	-43627.8	-71.4551	2103.45	1.48485
642	113.846	185.645	-40127.4	-66.9213	2836.09	1.70122	140.106	-43575.3	-71.3732	2246.28	1.52324
644	114.084	186.388	-39983.3	-66.6971	2969.71	1.74133	140.408	-43522.8	-71.2915	2388.94	1.56233
646	114.322	187.132	-39838.1	-66.4722	3102.88	1.78198	140.711	-43470.1	-71.2097	2531.44	1.60212
648	114.56	187.876	-39692	-66.2463	3235.6	1.82317	141.013	-43417.2	-71.1281	2673.78	1.64263
650	114.796	188.62	-39544.9	-66.0196	3367.87	1.8649	141.316	-43364.2	-71.0464	2815.95	1.68384
652	115.033	189.364	-39396.7	-65.792	3499.68	1.90715	141.619	-43311.1	-70.9649	2957.97	1.72578
654	115.268	190.109	-39247.5	-65.5636	3631.03	1.94993	141.921	-43257.9	-70.8833	3099.81	1.76844
656	115.504	190.854	-39097.4	-65.3343	3761.93	1.99323	142.224	-43204.5	-70.8019	3241.5	1.81183
658	115.738	191.599	-38946.1	-65.1041	3892.37	2.03706	142.526	-43151	-70.7204	3383.02	1.85595
660	115.972	192.344	-38793.9	-64.8731	4022.35	2.08139	142.829	-43097.4	-70.639	3524.38	1.90082
662	116.206	193.089	-38640.7	-64.6413	4151.86	2.12624	143.132	-43043.6	-70.5576	3665.58	1.94644
664	116.439	193.835	-38486.4	-64.4086	4280.91	2.17159	143.434	-42989.7	-70.4763	3806.61	1.9928
666	116.671	194.581	-38331.1	-64.175	4409.49	2.21743	143.737	-42935.6	-70.395	3947.48	2.03992
668	116.903	195.327	-38174.7	-63.9406	4537.61	2.26378	144.039	-42881.4	-70.3138	4088.19	2.08781
670	117.134	196.073	-38017.4	-63.7054	4665.26	2.31061	144.342	-42827.1	-70.2325	4228.74	2.13645
672	117.365	196.819	-37859	-63.4694	4792.43	2.35792	144.645	-42772.6	-70.1513	4369.12	2.18587
674	117.595	197.566	-37699.6	-63.2325	4919.13	2.40571	144.947	-42717.9	-70.0701	4509.34	2.23606
676	117.825	198.312	-37539.1	-62.9948	5045.36	2.45397	145.25	-42663.2	-69.989	4649.4	2.28704
678	118.054	199.059	-37377.6	-62.7562	5171.11	2.5027	145.552	-42608.2	-69.9079	4789.3	2.33879
680	118.282	199.806	-37215.1	-62.5169	5296.38	2.55188	145.855	-42553.2	-69.8268	4929.03	2.39134
682	118.51	200.553	-37051.5	-62.2767	5421.18	2.60151	146.158	-42497.9	-69.7457	5068.61	2.44467
684	118.738	201.301	-36886.9	-62.0357	5545.49	2.65158	146.46	-42442.6	-69.6646	5208.02	2.4988
686	118.964	202.048	-36721.3	-61.7938	5669.32	2.70209	146.763	-42387.1	-69.5836	5347.26	2.55373
688	119.191	202.796	-36554.6	-61.5512	5792.66	2.75302	147.065	-42331.4	-69.5025	5486.35	2.60947
690	119.416	203.544	-36386.8	-61.3078	5915.52	2.80437	147.368	-42275.6	-69.4215	5625.27	2.66601
692	119.642	204.292	-36218.1	-61.0635	6037.89	2.85613	147.671	-42219.6	-69.3405	5764.04	2.72336
694	119.866	205.041	-36048.2	-60.8185	6159.78	2.9083	147.973	-42163.4	-69.2595	5902.64	2.78153
696	120.09	205.789	-35877.4	-60.5726	6281.17	2.96086	148.276	-42107.1	-69.1785	6041.07	2.84052
698	120.314	206.538	-35705.4	-60.3259	6402.07	3.0138	148.578	-42050.7	-69.0975	6179.35	2.90033
700	120.536	207.286	-35532.5	-60.0785	6522.47	3.06712	148.881	-41994.1	-69.0165	6317.46	2.96096

## Sheet: PE
Temperature	Ethylene heat capacity	Poly(ethylene) heat capacity	Enthalpy of propagation	Entropy of propagation	Gibbs energy of propagation	Depolymerization equilibrium constant		fugacity coefficient	P = 1 atm														T_G = 298
(K)	(J/molK)	(J/molK)	(J/mol)	(J/molK)	(J/mol)	(a.u.)			T_G (K)														P (atm)
298	42.8327	20.7142	-52718.4	-64.6428	-33454.8	1.36675e-06		mol fraction styrene	273	283	293	303	313	323	333	343	353	363	373	383	393	403	1	2	3	4	5
300	43.0345	20.9322	-52762.6	-64.7907	-33325.4	1.57515e-06		0.005	0.994576	0.995135	0.995628	0.996066	0.996455	0.996802	0.997112	0.99739	0.99764	0.997865	0.998069	0.998253	0.998421	0.998572	0.995854	0.991731	0.987632	0.983557	0.979506
302	43.2366	21.1526	-52806.8	-64.9375	-33195.7	1.81212e-06		0.01	0.994546	0.995108	0.995604	0.996043	0.996434	0.996782	0.997094	0.997373	0.997624	0.997851	0.998055	0.99824	0.998408	0.998561	0.99583	0.991684	0.987562	0.983463	0.979389
304	43.4389	21.3753	-52851	-65.0832	-33065.7	2.08116e-06		0.015	0.994517	0.995081	0.995579	0.99602	0.996413	0.996763	0.997075	0.997356	0.997609	0.997836	0.998042	0.998228	0.998396	0.99855	0.995806	0.991637	0.987491	0.98337	0.979272
306	43.6413	21.6003	-52895.1	-65.2278	-32935.4	2.38608e-06		0.02	0.994488	0.995055	0.995555	0.995998	0.996392	0.996743	0.997057	0.997339	0.997593	0.997822	0.998028	0.998215	0.998384	0.998539	0.995783	0.99159	0.987421	0.983276	0.979156
308	43.844	21.8277	-52939.1	-65.3713	-32804.8	2.73113e-06		0.025	0.994459	0.995028	0.99553	0.995975	0.996371	0.996724	0.99704	0.997323	0.997577	0.997807	0.998014	0.998202	0.998373	0.998527	0.995759	0.991543	0.987351	0.983184	0.97904
310	44.0468	22.0575	-52983.1	-65.5137	-32673.9	3.12099e-06		0.03	0.994431	0.995002	0.995506	0.995953	0.99635	0.996705	0.997022	0.997306	0.997562	0.997793	0.998001	0.99819	0.998361	0.998516	0.995736	0.991497	0.987282	0.983091	0.978925
312	44.2497	22.2897	-53027.1	-65.655	-32542.7	3.56079e-06		0.035	0.994402	0.994976	0.995482	0.995931	0.99633	0.996686	0.997004	0.99729	0.997547	0.997778	0.997988	0.998177	0.998349	0.998505	0.995713	0.991451	0.987213	0.983	0.978811
314	44.4527	22.5243	-53071	-65.7953	-32411.2	4.05618e-06		0.04	0.994374	0.994949	0.995458	0.995909	0.996309	0.996667	0.996986	0.997273	0.997531	0.997764	0.997974	0.998164	0.998337	0.998494	0.99569	0.991405	0.987144	0.982908	0.978697
316	44.6558	22.7614	-53114.8	-65.9344	-32279.5	4.61338e-06		0.045	0.994346	0.994924	0.995434	0.995886	0.996289	0.996648	0.996969	0.997257	0.997516	0.99775	0.997961	0.998152	0.998325	0.998483	0.995667	0.991359	0.987076	0.982817	0.978584
318	44.859	23.001	-53158.5	-66.0724	-32147.5	5.23917e-06		0.05	0.994317	0.994898	0.99541	0.995865	0.996269	0.996629	0.996951	0.997241	0.997501	0.997736	0.997948	0.99814	0.998314	0.998472	0.995644	0.991313	0.987008	0.982727	0.978471
320	45.0622	23.2431	-53202.2	-66.2093	-32015.2	5.94102e-06		0.055	0.99429	0.994872	0.995387	0.995843	0.996248	0.99661	0.996934	0.997225	0.997486	0.997722	0.997935	0.998127	0.998302	0.998461	0.995622	0.991268	0.98694	0.982637	0.978359
322	45.2655	23.4878	-53245.8	-66.3451	-31882.7	6.72706e-06		0.06	0.994262	0.994847	0.995363	0.995821	0.996228	0.996592	0.996917	0.997209	0.997471	0.997708	0.997921	0.998115	0.998291	0.998451	0.995599	0.991223	0.986873	0.982548	0.978248
324	45.4688	23.7351	-53289.3	-66.4798	-31749.9	7.60618e-06		0.065	0.994234	0.994821	0.99534	0.9958	0.996208	0.996573	0.9969	0.997193	0.997456	0.997694	0.997908	0.998103	0.998279	0.99844	0.995577	0.991179	0.986806	0.982459	0.978137
326	45.6721	23.9849	-53332.7	-66.6134	-31616.8	8.5881e-06		0.07	0.994207	0.994796	0.995317	0.995778	0.996189	0.996555	0.996883	0.997177	0.997441	0.99768	0.997896	0.998091	0.998268	0.998429	0.995554	0.991134	0.986739	0.98237	0.978026
328	45.8754	24.2374	-53376.1	-66.7459	-31483.4	9.68336e-06		0.075	0.994179	0.994771	0.995293	0.995757	0.996169	0.996537	0.996866	0.997161	0.997427	0.997666	0.997883	0.998079	0.998257	0.998419	0.995532	0.99109	0.986673	0.982282	0.977917
330	46.0786	24.4926	-53419.3	-66.8773	-31349.8	1.09035e-05		0.08	0.994152	0.994746	0.995271	0.995736	0.996149	0.996518	0.996849	0.997145	0.997412	0.997652	0.99787	0.998067	0.998246	0.998408	0.99551	0.991046	0.986607	0.982195	0.977807
332	46.2818	24.7504	-53462.4	-67.0076	-31215.9	1.2261e-05		0.085	0.994125	0.994721	0.995248	0.995714	0.99613	0.9965	0.996832	0.99713	0.997397	0.997639	0.997857	0.998055	0.998234	0.998398	0.995488	0.991002	0.986542	0.982107	0.977699
334	46.485	25.011	-53505.4	-67.1367	-31081.7	1.37694e-05		0.09	0.994098	0.994696	0.995225	0.995694	0.99611	0.996482	0.996815	0.997114	0.997383	0.997625	0.997844	0.998043	0.998223	0.998387	0.995466	0.990958	0.986477	0.982021	0.977591
336	46.6881	25.2742	-53548.3	-67.2648	-30947.3	1.54435e-05		0.095	0.994071	0.994672	0.995202	0.995673	0.996091	0.996464	0.996799	0.997099	0.997368	0.997612	0.997832	0.998031	0.998212	0.998377	0.995444	0.990915	0.986412	0.981935	0.977483
338	46.8911	25.5403	-53591.1	-67.3916	-30812.7	1.72991e-05		0.1	0.994045	0.994647	0.99518	0.995652	0.996072	0.996447	0.996782	0.997083	0.997354	0.997598	0.997819	0.998019	0.998201	0.998366	0.995423	0.990872	0.986347	0.981849	0.977376
340	47.094	25.8092	-53633.7	-67.5174	-30677.8	1.93536e-05		0.2	0.993543	0.994187	0.994756	0.995261	0.99571	0.996111	0.996471	0.996794	0.997084	0.997346	0.997584	0.997799	0.997994	0.998172	0.995016	0.99006	0.985132	0.980232	0.975361
342	47.2969	26.0809	-53676.2	-67.6421	-30542.6	2.16257e-05		0.3	0.9931	0.99378	0.994382	0.994916	0.995391	0.995816	0.996196	0.996538	0.996846	0.997124	0.997375	0.997604	0.997811	0.998	0.994656	0.989342	0.984058	0.978802	0.973576
344	47.4995	26.3554	-53718.6	-67.7656	-30407.2	2.41354e-05		0.4	0.992716	0.993427	0.994057	0.994616	0.995114	0.995559	0.995958	0.996316	0.996639	0.996931	0.997195	0.997435	0.997652	0.997851	0.994345	0.988719	0.983124	0.977559	0.972023
346	47.7021	26.6329	-53760.8	-67.8879	-30271.6	2.69044e-05		0.5	0.99239	0.993129	0.993782	0.994362	0.994879	0.995342	0.995756	0.996128	0.996464	0.996767	0.997042	0.997291	0.997518	0.997725	0.994081	0.988191	0.982332	0.976501	0.970701
348	47.9045	26.9132	-53802.8	-68.0091	-30135.7	2.99563e-05		average	0.994078	0.994678	0.995208	0.995678	0.996096	0.996469	0.996803	0.997103	0.997372	0.997615	0.997835	0.998034	0.998215	0.998379	0.99545	0.990925	0.986427	0.981954	0.977506
350	48.1068	27.1965	-53844.7	-68.1292	-29999.5	3.33161e-05
352	48.3089	27.4828	-53886.5	-68.2481	-29863.1	3.70111e-05		Gas-liquid partition coefficient	T_P (K)
354	48.5109	27.7721	-53928	-68.3658	-29726.5	4.10704e-05		total monomer concentration (mol/L)	298	308	318	328	338	348	358	368	378	388	398
356	48.7127	28.0645	-53969.4	-68.4824	-29589.7	4.55252e-05		0.00582511	42.5212	48.5813	54.8675	61.3211	67.8834	74.4961	81.103	87.65	94.0864	100.364	106.44
358	48.9142	28.3599	-54010.6	-68.5978	-29452.6	5.04091e-05		0.0575958	42.5236	48.5839	54.8702	61.3239	67.8862	74.499	81.1058	87.6529	94.0892	100.367	106.443
360	49.1156	28.6585	-54051.6	-68.7121	-29315.3	5.57581e-05		0.555379	42.5443	48.6056	54.8928	61.3472	67.9099	74.523	81.1299	87.6767	94.1126	100.39	106.464
362	49.3168	28.9602	-54092.5	-68.8251	-29177.8	6.16106e-05		3.88367	42.6078	48.672	54.9615	61.4176	67.9813	74.5946	81.201	87.7465	94.18	100.454	106.523
364	49.5177	29.265	-54133.1	-68.937	-29040	6.80079e-05		9.81641	42.6218	48.6863	54.9757	61.4315	67.9947	74.6071	81.2123	87.7561	94.1873	100.458	106.523
366	49.7185	29.5731	-54173.5	-69.0477	-28902	7.49939e-05		11.5688	42.6203	48.6847	54.9739	61.4295	67.9924	74.6046	81.2095	87.753	94.1838	100.454
368	49.919	29.8844	-54213.6	-69.1572	-28763.8	8.26155e-05		average	42.5732	48.6356	54.9236	61.3785	67.9413	74.5541	81.1603	87.7059	94.1399	100.414	106.479
370	50.1192	30.199	-54253.6	-69.2654	-28625.4	9.09231e-05
372	50.3192	30.5169	-54293.3	-69.3725	-28486.7	9.99699e-05
374	50.519	30.8382	-54332.8	-69.4784	-28347.9	0.000109813
376	50.7185	31.1628	-54372	-69.583	-28208.8	0.000120513
378	50.9177	31.4908	-54411	-69.6864	-28069.6	0.000132134
380	51.1167	31.8223	-54449.7	-69.7886	-27930.1	0.000144745
382	51.3153	32.1573	-54488.2	-69.8895	-27790.4	0.000158418
384	51.5137	32.4959	-54526.4	-69.9892	-27650.5	0.000173231
386	51.7118	32.8379	-54564.3	-70.0876	-27510.5	0.000189265
388	51.9096	33.1836	-54601.9	-70.1847	-27370.2	0.000206608
390	52.1071	33.5329	-54639.2	-70.2806	-27229.7	0.00022535
392	52.3043	33.8859	-54676.2	-70.3752	-27089.1	0.000245589
394	52.5011	34.2427	-54712.8	-70.4686	-26948.2	0.000267427
396	52.6977	34.6031	-54749.2	-70.5606	-26807.2	0.000290973
398	52.8939	34.9674	-54785.2	-70.6513	-26666	0.000316341
400	53.0898	35.3355	-54820.9	-70.7408	-26524.6	0.000343653
402	53.2853	35.7075	-54856.2	-70.8289	-26383	0.000373034
404	53.4805	36.0834	-54891.2	-70.9157	-26241.3	0.00040462
406	53.6754	36.4632	-54925.8	-71.0011	-26099.4	0.000438552
408	53.8699	36.8471	-54960	-71.0852	-25957.3	0.000474977
410	54.0641	37.2349	-54993.9	-71.168	-25815	0.000514053
412	54.2579	37.6269	-55027.4	-71.2494	-25672.6	0.000555944
414	54.4513	38.023	-55060.4	-71.3295	-25530	0.000600821
416	54.6444	38.4233	-55093.1	-71.4081	-25387.3	0.000648867
418	54.8372	38.8278	-55125.3	-71.4854	-25244.4	0.00070027
420	55.0295	39.2365	-55157.1	-71.5613	-25101.3	0.00075523
422	55.2215	39.6495	-55188.5	-71.6358	-24958.1	0.000813955
424	55.4131	40.0669	-55219.4	-71.7089	-24814.8	0.000876664
426	55.6043	40.4887	-55249.8	-71.7806	-24671.3	0.000943584
428	55.7951	40.9149	-55279.8	-71.8508	-24527.7	0.00101496
430	55.9856	41.3456	-55309.4	-71.9196	-24383.9	0.00109103
432	56.1757	41.7809	-55338.4	-71.987	-24240	0.00117206
434	56.3653	42.2207	-55366.9	-72.0529	-24096	0.00125833
436	56.5546	42.6652	-55395	-72.1174	-23951.8	0.00135012
438	56.7435	43.1143	-55422.5	-72.1803	-23807.5	0.00144772
440	56.932	43.5682	-55449.5	-72.2418	-23663.1	0.00155144
442	57.1201	44.0268	-55475.9	-72.3018	-23518.5	0.00166161
444	57.3077	44.4903	-55501.8	-72.3603	-23373.9	0.00177856
446	57.495	44.9586	-55527.2	-72.4173	-23229.1	0.00190264
448	57.6819	45.4319	-55552	-72.4727	-23084.2	0.00203421
450	57.8683	45.9102	-55576.2	-72.5266	-22939.2	0.00217366
452	58.0544	46.3935	-55599.8	-72.579	-22794.1	0.00232136
454	58.24	46.8818	-55622.8	-72.6298	-22648.9	0.00247774
456	58.4252	47.3754	-55645.2	-72.6791	-22503.6	0.0026432
458	58.61	47.8741	-55667	-72.7268	-22358.2	0.0028182
460	58.7944	48.378	-55688.2	-72.7728	-22212.7	0.00300318
462	58.9783	48.8873	-55708.7	-72.8173	-22067.1	0.00319862
464	59.1619	49.402	-55728.5	-72.8602	-21921.4	0.003405
466	59.345	49.922	-55747.7	-72.9015	-21775.6	0.00362283
468	59.5277	50.4475	-55766.2	-72.9411	-21629.8	0.00385263
470	59.71	50.9786	-55784	-72.979	-21483.9	0.00409495
472	59.8918	51.5152	-55801.1	-73.0154	-21337.9	0.00435035
474	60.0732	52.0575	-55817.5	-73.05	-21191.8	0.00461939
476	60.2542	52.6056	-55833.2	-73.083	-21045.7	0.00490269
478	60.4347	53.1593	-55848.1	-73.1143	-20899.5	0.00520085
480	60.6148	53.7189	-55862.3	-73.1439	-20753.2	0.00551451
482	60.7945	54.2844	-55875.7	-73.1717	-20606.9	0.00584434
484	60.9738	54.8559	-55888.3	-73.1979	-20460.5	0.006191
486	61.1526	55.4333	-55900.2	-73.2223	-20314.1	0.0065552
488	61.3309	56.0169	-55911.2	-73.245	-20167.7	0.00693765
490	61.5089	56.6066	-55921.4	-73.2658	-20021.1	0.0073391
492	61.6864	57.2025	-55930.8	-73.285	-19874.6	0.0077603
494	61.8634	57.8046	-55939.3	-73.3023	-19728	0.00820204
496	62.0401	58.4132	-55947	-73.3178	-19581.4	0.00866513
498	62.2163	59.0281	-55953.8	-73.3315	-19434.7	0.00915039
500	62.392	59.6495	-55959.8	-73.3434	-19288.1	0.00965867
502	62.5673	60.2774	-55964.8	-73.3535	-19141.4	0.0101908
504	62.7422	60.9119	-55968.9	-73.3617	-18994.6	0.0107478
506	62.9166	61.5531	-55972.1	-73.368	-18847.9	0.0113305
508	63.0906	62.2011	-55974.4	-73.3724	-18701.2	0.0119398
510	63.2641	62.8559	-55975.7	-73.375	-18554.4	0.0125768
512	63.4372	63.5176	-55976	-73.3756	-18407.7	0.0132424
514	63.6098	64.1862	-55975.3	-73.3743	-18260.9	0.0139376
516	63.782	64.8619	-55973.7	-73.3711	-18114.2	0.0146634
518	63.9538	65.5447	-55971	-73.3659	-17967.4	0.015421
520	64.1251	66.2347	-55967.3	-73.3588	-17820.7	0.0162114
522	64.296	66.9319	-55962.6	-73.3497	-17674	0.0170358
524	64.4664	67.6365	-55956.8	-73.3386	-17527.3	0.0178951
526	64.6364	68.3485	-55949.9	-73.3255	-17380.7	0.0187907
528	64.8059	69.068	-55941.9	-73.3104	-17234	0.0197237
530	64.975	69.7951	-55932.8	-73.2932	-17087.4	0.0206953
532	65.1437	70.5298	-55922.6	-73.274	-16940.9	0.0217068
534	65.3119	71.2723	-55911.3	-73.2527	-16794.3	0.0227593
536	65.4796	72.0226	-55898.8	-73.2293	-16647.8	0.0238541
538	65.6469	72.7808	-55885.1	-73.2039	-16501.4	0.0249927
540	65.8138	73.5469	-55870.2	-73.1763	-16355	0.0261762
542	65.9802	74.3212	-55854.1	-73.1466	-16208.7	0.0274061
544	66.1462	75.1035	-55836.8	-73.1147	-16062.5	0.0286837
546	66.3117	75.8941	-55818.3	-73.0807	-15916.3	0.0300104
548	66.4768	76.6931	-55798.5	-73.0445	-15770.1	0.0313876
550	66.6414	77.5004	-55777.4	-73.0061	-15624.1	0.0328167
551	66.7236	77.9073	-55766.4	-72.9861	-15551.1	0.0335512
552	66.8056	78.3163	-55755.1	-72.9655	-15478.1	0.0342993
553	66.8875	78.7274	-55743.4	-72.9444	-15405.2	0.0350611
554	66.9693	79.1407	-55731.4	-72.9227	-15332.2	0.0358368
555	67.0511	79.5562	-55719	-72.9004	-15259.3	0.0366265
556	67.1327	79.9738	-55706.4	-72.8776	-15186.4	0.0374306
557	67.2141	80.3937	-55693.4	-72.8542	-15113.6	0.0382492
558	67.2955	80.8157	-55680	-72.8303	-15040.7	0.0390824
559	67.3768	81.24	-55666.3	-72.8058	-14967.9	0.0399305
560	67.4579	81.6664	-55652.3	-72.7807	-14895.1	0.0407936
561	67.539	82.0952	-55637.9	-72.755	-14822.3	0.041672
562	67.6199	82.5261	-55623.2	-72.7288	-14749.6	0.0425659
563	67.7007	82.9594	-55608.1	-72.702	-14676.9	0.0434754
564	67.7814	83.3949	-55592.7	-72.6746	-14604.2	0.0444007
565	67.862	83.8327	-55576.9	-72.6466	-14531.5	0.0453421
566	67.9425	84.2728	-55560.7	-72.6181	-14458.9	0.0462998
567	68.0229	84.7152	-55544.2	-72.5889	-14386.3	0.0472739
568	68.1031	85.1599	-55527.3	-72.5592	-14313.7	0.0482646
569	68.1833	85.607	-55510.1	-72.5288	-14241.2	0.0492722
570	68.2633	86.0564	-55492.5	-72.4979	-14168.7	0.0502969
571	68.3433	86.5082	-55474.5	-72.4664	-14096.2	0.0513389
572	68.4231	86.9623	-55456.1	-72.4343	-14023.7	0.0523983
573	68.5028	87.4188	-55437.4	-72.4016	-13951.3	0.0534754
574	68.5824	87.8778	-55418.3	-72.3683	-13878.9	0.0545704
575	68.6619	88.3391	-55398.8	-72.3344	-13806.6	0.0556835
576	68.7413	88.8028	-55379	-72.2998	-13734.3	0.0568149
577	68.8205	89.269	-55358.7	-72.2647	-13662	0.0579649
578	68.8997	89.7377	-55338.1	-72.2289	-13589.7	0.0591335
579	68.9787	90.2088	-55317	-72.1926	-13517.5	0.0603212
580	69.0577	90.6823	-55295.6	-72.1556	-13445.3	0.061528
581	69.1365	91.1584	-55273.8	-72.118	-13373.2	0.0627542
582	69.2152	91.6369	-55251.6	-72.0798	-13301.1	0.0639999
583	69.2938	92.118	-55228.9	-72.041	-13229	0.0652655
584	69.3723	92.6016	-55205.9	-72.0015	-13157	0.0665511
585	69.4507	93.0877	-55182.5	-71.9614	-13085	0.067857
586	69.529	93.5764	-55158.6	-71.9207	-13013.1	0.0691833
587	69.6072	94.0677	-55134.4	-71.8793	-12941.2	0.0705303
588	69.6852	94.5615	-55109.7	-71.8374	-12869.3	0.0718982
589	69.7632	95.0579	-55084.6	-71.7947	-12797.5	0.0732872
590	69.841	95.5569	-55059.1	-71.7515	-12725.8	0.0746976
591	69.9188	96.0586	-55033.2	-71.7075	-12654	0.0761295
592	69.9964	96.5629	-55006.8	-71.663	-12582.3	0.0775832
593	70.0739	97.0698	-54980.1	-71.6178	-12510.7	0.0790588
594	70.1513	97.5794	-54952.8	-71.5719	-12439.1	0.0805567
595	70.2286	98.0916	-54925.2	-71.5254	-12367.6	0.0820771
596	70.3058	98.6066	-54897.1	-71.4783	-12296.1	0.08362
597	70.3828	99.1242	-54868.6	-71.4305	-12224.6	0.0851859
598	70.4598	99.6446	-54839.6	-71.382	-12153.2	0.0867748
599	70.5367	100.168	-54810.2	-71.3329	-12081.8	0.0883871
600	70.6134	100.694	-54780.4	-71.2831	-12010.5	0.0900229
601	70.6901	101.222	-54750.1	-71.2326	-11939.3	0.0916825
602	70.7666	101.754	-54719.3	-71.1815	-11868.1	0.093366
603	70.843	102.288	-54688.1	-71.1296	-11796.9	0.0950738
604	70.9193	102.825	-54656.4	-71.0772	-11725.8	0.0968059
605	70.9955	103.365	-54624.3	-71.024	-11654.8	0.0985628
606	71.0716	103.907	-54591.7	-70.9702	-11583.8	0.100344
607	71.1476	104.453	-54558.6	-70.9156	-11512.8	0.102151
608	71.2235	105.001	-54525.1	-70.8604	-11441.9	0.103983
609	71.2993	105.552	-54491	-70.8045	-11371.1	0.105841
610	71.3749	106.106	-54456.5	-70.7479	-11300.3	0.107724
611	71.4505	106.663	-54421.6	-70.6906	-11229.6	0.109633
612	71.5259	107.223	-54386.1	-70.6327	-11158.9	0.111569
613	71.6013	107.786	-54350.2	-70.574	-11088.3	0.113531
614	71.6765	108.352	-54313.7	-70.5146	-11017.8	0.115519
615	71.7516	108.921	-54276.8	-70.4545	-10947.3	0.117534
616	71.8267	109.493	-54239.4	-70.3937	-10876.9	0.119576
617	71.9016	110.067	-54201.5	-70.3322	-10806.5	0.121646
618	71.9764	110.645	-54163.1	-70.27	-10736.2	0.123743
619	72.0511	111.226	-54124.2	-70.2071	-10666	0.125867
620	72.1257	111.81	-54084.7	-70.1434	-10595.8	0.12802
621	72.2001	112.397	-54044.8	-70.0791	-10525.7	0.130201
622	72.2745	112.987	-54004.3	-70.014	-10455.6	0.132409
623	72.3488	113.58	-53963.4	-69.9481	-10385.7	0.134647
624	72.4229	114.176	-53921.9	-69.8816	-10315.7	0.136913
625	72.497	114.776	-53879.8	-69.8143	-10245.9	0.139208
626	72.5709	115.378	-53837.3	-69.7463	-10176.1	0.141532
627	72.6448	115.984	-53794.2	-69.6776	-10106.4	0.143885
628	72.7185	116.593	-53750.6	-69.6081	-10036.8	0.146268
629	72.7921	117.205	-53706.5	-69.5378	-9967.19	0.148681
630	72.8657	117.82	-53661.8	-69.4668	-9897.69	0.151124
631	72.9391	118.439	-53616.6	-69.3951	-9828.26	0.153596
632	73.0124	119.061	-53570.8	-69.3226	-9758.9	0.156099
633	73.0856	119.686	-53524.5	-69.2494	-9689.61	0.158633
634	73.1587	120.314	-53477.6	-69.1754	-9620.4	0.161197
635	73.2317	120.946	-53430.2	-69.1006	-9551.26	0.163792
636	73.3046	121.581	-53382.2	-69.0251	-9482.2	0.166418
637	73.3773	122.219	-53333.6	-68.9488	-9413.21	0.169075
638	73.45	122.86	-53284.5	-68.8718	-9344.3	0.171764
639	73.5226	123.505	-53234.8	-68.7939	-9275.47	0.174484
640	73.595	124.154	-53184.5	-68.7153	-9206.71	0.177236
641	73.6674	124.806	-53133.7	-68.6359	-9138.04	0.18002
642	73.7397	125.461	-53082.2	-68.5558	-9069.44	0.182836
643	73.8118	126.119	-53030.2	-68.4748	-9000.93	0.185685
644	73.8838	126.781	-52977.6	-68.3931	-8932.49	0.188565
645	73.9558	127.447	-52924.4	-68.3105	-8864.14	0.191479
646	74.0276	128.116	-52870.6	-68.2272	-8795.87	0.194425
647	74.0993	128.789	-52816.2	-68.1431	-8727.69	0.197404
648	74.171	129.465	-52761.3	-68.0581	-8659.59	0.200417
649	74.2425	130.144	-52705.7	-67.9724	-8591.57	0.203462
650	74.3139	130.828	-52649.4	-67.8859	-8523.64	0.206541
651	74.3852	131.514	-52592.6	-67.7985	-8455.8	0.209654
652	74.4564	132.205	-52535.2	-67.7103	-8388.05	0.2128
653	74.5275	132.899	-52477.1	-67.6214	-8320.38	0.21598
654	74.5985	133.597	-52418.4	-67.5316	-8252.8	0.219194
655	74.6694	134.298	-52359.1	-67.4409	-8185.32	0.222442
656	74.7402	135.003	-52299.2	-67.3495	-8117.92	0.225725
657	74.8109	135.712	-52238.6	-67.2572	-8050.62	0.229042
658	74.8815	136.424	-52177.4	-67.1641	-7983.41	0.232393
659	74.952	137.14	-52115.5	-67.0701	-7916.29	0.235779
660	75.0223	137.86	-52053	-66.9754	-7849.27	0.239199
661	75.0926	138.584	-51989.8	-66.8797	-7782.34	0.242655
662	75.1628	139.311	-51926	-66.7832	-7715.51	0.246145
663	75.2329	140.043	-51861.5	-66.6859	-7648.77	0.249671
664	75.3028	140.778	-51796.4	-66.5877	-7582.14	0.253231
665	75.3727	141.517	-51730.6	-66.4887	-7515.6	0.256827
666	75.4424	142.26	-51664.1	-66.3888	-7449.16	0.260458
667	75.5121	143.007	-51596.9	-66.288	-7382.82	0.264125
668	75.5817	143.758	-51529.1	-66.1864	-7316.59	0.267827
669	75.6511	144.512	-51460.6	-66.0839	-7250.45	0.271565
670	75.7205	145.271	-51391.4	-65.9806	-7184.42	0.275339
671	75.7897	146.033	-51321.5	-65.8763	-7118.49	0.279148
672	75.8589	146.8	-51250.9	-65.7712	-7052.67	0.282993
673	75.9279	147.571	-51179.6	-65.6652	-6986.95	0.286874
674	75.9969	148.345	-51107.6	-65.5583	-6921.34	0.290791
675	76.0657	149.124	-51034.9	-65.4505	-6855.83	0.294744
676	76.1344	149.907	-50961.5	-65.3418	-6790.44	0.298733
677	76.2031	150.694	-50887.4	-65.2322	-6725.15	0.302758
678	76.2716	151.485	-50812.5	-65.1217	-6659.97	0.306819
679	76.3401	152.28	-50736.9	-65.0103	-6594.91	0.310916
680	76.4084	153.08	-50660.6	-64.8981	-6529.95	0.31505
681	76.4766	153.883	-50583.6	-64.7848	-6465.11	0.31922
682	76.5448	154.691	-50505.8	-64.6707	-6400.38	0.323426
683	76.6128	155.503	-50427.3	-64.5557	-6335.77	0.327668
684	76.6807	156.32	-50348	-64.4397	-6271.27	0.331947
685	76.7486	157.14	-50268	-64.3228	-6206.89	0.336261
686	76.8163	157.965	-50187.2	-64.205	-6142.63	0.340612
687	76.8839	158.795	-50105.7	-64.0862	-6078.48	0.345
688	76.9515	159.628	-50023.4	-63.9665	-6014.45	0.349423
689	77.0189	160.466	-49940.4	-63.8459	-5950.55	0.353883
690	77.0862	161.309	-49856.5	-63.7243	-5886.76	0.358379
691	77.1535	162.155	-49771.9	-63.6018	-5823.1	0.362911
692	77.2206	163.007	-49686.5	-63.4783	-5759.56	0.367479
693	77.2876	163.862	-49600.3	-63.3538	-5696.14	0.372083
694	77.3546	164.723	-49513.4	-63.2284	-5632.85	0.376723
695	77.4214	165.587	-49425.6	-63.102	-5569.69	0.381399
696	77.4881	166.457	-49337	-62.9747	-5506.65	0.386111
697	77.5548	167.331	-49247.7	-62.8464	-5443.74	0.390859
698	77.6213	168.209	-49157.5	-62.7171	-5380.96	0.395643
699	77.6878	169.092	-49066.5	-62.5868	-5318.3	0.400462
700	77.7541	169.98	-48974.7	-62.4555	-5255.78	0.405317
